# Supplementary material for: High-Throughput Microscopy Characterization of Rare LDLR Variants
Source: PubMed Central journal article supplement — JACC Basic Transl Sci. 2023 Jun 28;8(8):1010–21. doi: 10.1016/j.jacbts.2023.03.013 (PMC10504398; doi:10.1016/j.jacbts.2023.03.013), 2023-06-28
Supplement: mmc1.pdf [file mmc1.pdf]

**Supplemental Table 1.** ACMG/AMP classification and variant class of the control set variants.

| Variant                            | ClinVar ID | Functional study results <sup>a</sup> |                | Class of <i>LDLR</i> variant<br>(Cytometry results) | ACMG Classification |
|------------------------------------|------------|---------------------------------------|----------------|-----------------------------------------------------|---------------------|
|                                    |            | Expression                            | Activity       |                                                     |                     |
| c.1A>T, (p.Met1Leu)                | 250968     | <10%/<10%                             | <10%/<10%      | Class I—Null (16)                                   | Likely pathogenic   |
| c.76A>T, (p.Arg26*)                | 251006     | <10%/<10%                             | <10%/<10%      | Class I – Null (NA)                                 | Pathogenic          |
| c.81C>T, (p.Cys27Cys)              | 251010     | 101%/100%                             | 105%/85%       | Normal (NA)                                         | Benign              |
| c.261G>A, (p.Trp87*)               | 251100     | <10%/<10%                             | <10%/<10%      | Class I—Null (17)                                   | Pathogenic          |
| c.326G>T, (p.Cys109Phe)            | 251157     | 105%/104%                             | <b>31%/42%</b> | Class III—Binding (19)                              | Pathogenic          |
| c.427T>C, (p.Cys143Arg)            | 251219     | 95%/98%                               | <b>31%/30%</b> | Class III—Binding (19)                              | Pathogenic          |
| c.551G>A, p.(Cys184Tyr)            | 3739       | 112%/107%                             | <b>44%/46%</b> | Class III—Binding (18)                              | Likely pathogenic   |
| c.618_638del, (p.Gly207_Ser213del) | 265899     | 98%/102%                              | <b>24%/34%</b> | Class III—Binding (18)                              | Pathogenic          |
| c.661G>T, (p.Asp221Tyr)            | 251356     | 101%/108%                             | <b>27%/45%</b> | Class III—Binding (18)                              | Pathogenic          |
| c.799G>A, (p.Glu267Lys)            | 251459     | 97%/111%                              | <b>66%/60%</b> | Class III—Binding (19)                              | Likely pathogenic   |
| c.1054T>A, (p.Cys352Ser)           | 251617     | 104%/97%                              | <b>57%/53%</b> | Class III—Binding (19)                              | Pathogenic          |
| c.1171G>A, (Ala391Thr)             | 183138     | 103%/109%                             | 105%/100%      | Normal (NA)                                         | Benign              |
| c.1246C>T, (p.Arg416Trp)           | 183110     | 71%/81%                               | 89%/119%       | Class V—Recycling (17)                              | Pathogenic          |
| c.1352T>C, (p.Ile451Thr)           | 251801     | <10%/<10%                             | <10%/<10%      | Class I—Null (19)                                   | Pathogenic          |
| c.1361C>A, (p.Thr454Asn)           | 251812     | 80%/85%                               | 86%/89%        | Class V—Recycling (17)                              | Likely pathogenic   |
| c.1413A>G, (p.Arg471Arg)           | 200916     | 101%/110%                             | 109%/112%      | Normal (NA)                                         | Benign              |
| c.1455C>G, (p.His485Gln)           | 251851     | <b>63%/73%</b>                        | 71%/90%        | Class IIb—Expression (19)                           | Likely pathogenic   |
| c.1474 G>A, p.(Asp492Asn)          | 161285     | <b>69%/80%</b>                        | 73%/73%        | Class V—Recycling (19)                              | Likely pathogenic   |
| c.1499T>C, p.(Val500Ala)           | 265903     | <b>40%/53%</b>                        | 82%/65%        | Class IIb—Expression (19)                           | Likely pathogenic   |

|                          |        |                        |                        |                               |                   |
|--------------------------|--------|------------------------|------------------------|-------------------------------|-------------------|
| c.1775G>A, (p.Gly592Glu) | 161271 | <b>57%/65%</b>         | 84%/78%                | Class V—Recycling (18)        | Pathogenic        |
| c.1802A>T, (p.Asp601Val) | 252040 | <b>&lt;10%/&lt;10%</b> | <b>&lt;10%/&lt;10%</b> | Class I—Null (18)             | Pathogenic        |
| c.1840T>A, (p.Phe614Ile) | 252061 | <b>67%/71%</b>         | 95%/100%               | Class IIb—Expression (19)     | Likely pathogenic |
| c.1876G>A, (p.Glu626Lys) | 183127 | 103%/109%              | <b>67%/76%</b>         | Class IV—Internalization (19) | Pathogenic        |
| c.1966C>A, (p.His656Asn) | 252136 | 101%/97%               | 104%/100%              | Normal (18)                   | VUS               |
| c.2177C>T, (p.Thr726Ile) | 36461  | 107%/111%              | 103%/96%               | Normal (NA)                   | Benign            |
| c.2291T>C, (p.Ile764Thr) | 252265 | 108%/105%              | 107%/106%              | Normal (18)                   | Likely benign     |
| c.2475C>A, (p.Asn825Lys) | 252341 | 100%/115%              | 80%/71%                | Class IV—Internalization (17) | Likely pathogenic |

<sup>a</sup>Percentages for the 24-well and 96-well assays, on the left and right, respectively. Percentages in bold represent values below the 70% cutoff, and thus affecting LDLR function. NA = not available.
